# Supplementary material for: Quantitative Association between Computed-Tomography-Based L1 Skeletal Muscle Indices and Major Adverse Clinical Events Following Percutaneous Coronary Intervention
Source: MDPI journal article supplement (doi:10.3390/jcm12237483), 2023-12-03
Supplement: s1 [file s1]

## **Supplementary Data**

### **Quantitative Association Between Computed Tomography-based L1 Skeletal Muscle Indices and Major Adverse Clinical Events Following Percutaneous Coronary Intervention**

Eun Jin Park<sup>a, †</sup>, So Yeon Park<sup>b, †</sup>, Jaeho Kang<sup>a</sup>, Wonsang Chu<sup>a</sup>, and Dong Oh Kang<sup>a, \*\*</sup>

<sup>a</sup> Cardiovascular Center, Department of Internal Medicine, Korea University Guro Hospital, Korea University College of Medicine, Seoul, Republic of Korea

<sup>b</sup> Healthcare Center, Department of Radiology, Gangnam Severance Hospital, Seoul, Republic of Korea

<sup>†</sup> These authors contributed equally to this work

## Supplementary Tables

**Table S1. Detailed etiologies of non-cardiac death in the study population**

|                           | <b>Total population</b> | <b>L1 SMI Q1</b> | <b>L1 SMI Q2</b> | <b>L1 SMI Q3</b> | <b>L1 SMI Q4</b> |
|---------------------------|-------------------------|------------------|------------------|------------------|------------------|
|                           | <b>(n=475)</b>          | <b>(n=124)</b>   | <b>(n=116)</b>   | <b>(n=112)</b>   | <b>(n=123)</b>   |
| Non-cardiac death         | 33 (6.9)                | 19 (15.3)        | 6 (5.2)          | 6 (5.4)          | 2 (1.6)          |
| Infectious disease        | 16 (3.4)                | 11 (8.9)         | 2 (1.7)          | 2 (1.8)          | 1 (0.8)          |
| Intracranial hemorrhage   | 6 (1.3)                 | 3 (2.4)          | 1 (0.9)          | 1 (0.9)          | 1 (0.8)          |
| Gastrointestinal bleeding | 2 (0.4)                 | 1 (0.8)          | 1 (0.9)          | 0 (0.0)          | 0 (0.0)          |
| Respiratory failure       | 5 (1.1)                 | 2 (1.6)          | 1 (0.9)          | 2 (1.8)          | 0 (0.0)          |
| Malignancy                | 3 (0.6)                 | 1 (0.8)          | 1 (0.9)          | 1 (0.9)          | 0 (0.0)          |
| Acute kidney injury       | 1 (0.2)                 | 1 (0.8)          | 0 (0.0)          | 0 (0.0)          | 0 (0.0)          |

Data are expressed as n (%). L1, first lumbar vertebra; Q1, quartile 1; Q2, quartile 2; Q3, quartile 3; Q4, quartile 4; SMI, skeletal muscle index.

**Table S2. Three-year clinical outcomes based on the frailty levels**

|                          | <b>Non-frail<br/>(n=354)</b> | <b>Mild to moderate frailty<br/>(n=105)</b> | <b>Severe frailty<br/>(n=116)</b> | <b>Log-rank<br/>P-value</b> |
|--------------------------|------------------------------|---------------------------------------------|-----------------------------------|-----------------------------|
| All-cause mortality      | 22 (6.4)                     | 19 (19.1)                                   | 9 (58.3)                          | <0.001                      |
| Cardiac death            | 7 (2.0)                      | 7 (7.4)                                     | 3 (26.2)                          | <0.001                      |
| Non-cardiac death        | 15 (4.5)                     | 12 (12.6)                                   | 6 (43.3)                          | <0.001                      |
| Non-fatal MI             | 10 (3.0)                     | 5 (5.5)                                     | 2 (20.9)                          | 0.070                       |
| Repeat revascularization | 36 (12.1)                    | 10 (13.3)                                   | 0 (0.0)                           | 0.504                       |
| MACE                     | 58 (17.8)                    | 28 (29.1)                                   | 9 (58.3)                          | <0.001                      |

Data are expressed as incidence (%). Frailty status was assessed using the Rockwood Clinical Frailty Scale (CFS), categorized as non-frail (CFS <5), mild to moderate frailty (CFS 5-6), and severe frailty (CFS 7). MACE, major adverse cardiovascular event; MI, myocardial infarction.

**Table S3. Complete dataset of stepwise multivariate analysis for 3-year clinical outcomes**

|                                          | 3-year all-cause mortality |                   | 3-year MACE      |                    |
|------------------------------------------|----------------------------|-------------------|------------------|--------------------|
|                                          | OR (95% CI)                | P-value           | OR (95% CI)      | P-value            |
| <b>Model 2</b>                           |                            |                   |                  |                    |
| L1 SMI quartiles                         |                            | 0.007 (for trend) |                  | <0.001 (for trend) |
| Quartile 4                               | Reference                  |                   | Reference        |                    |
| Quartile 3                               | 1.71 (0.52–5.56)           | 0.370             | 3.17 (1.28–7.86) | 0.013              |
| Quartile 2                               | 2.20 (0.72–6.74)           | 0.164             | 5.93 (2.47–14.2) | <0.001             |
| Quartile 1                               | 5.62 (1.77–17.8)           | 0.003             | 15.5 (6.28–38.4) | <0.001             |
| Age >65 years                            | 0.93 (0.51–1.68)           | 0.820             | 0.89 (0.57–1.39) | 0.617              |
| Gender (male)                            | 4.25 (1.74–10.3)           | 0.001             | 1.38 (0.86–2.24) | 0.179              |
| BMI (per 1.0 kg/m <sup>2</sup> increase) | 1.04 (0.94–1.16)           | 0.380             | 1.13 (1.05–1.21) | 0.001              |
| <b>Model 3</b>                           |                            |                   |                  |                    |
| L1 SMI quartiles                         |                            | 0.030 (for trend) |                  | <0.001 (for trend) |
| Quartile 4                               | Reference                  |                   | Reference        |                    |
| Quartile 3                               | 1.76 (0.54–5.71)           | 0.342             | 3.09 (1.25–7.65) | 0.014              |
| Quartile 2                               | 2.32 (0.76–7.08)           | 0.139             | 5.95 (2.49–14.2) | <0.001             |
| Quartile 1                               | 4.93 (1.54–15.7)           | 0.007             | 12.7 (5.13–31.6) | <0.001             |
| Age >65 years                            | 1.14 (0.62–2.10)           | 0.654             | 1.06 (0.67–1.68) | 0.793              |
| Gender (male)                            | 3.32 (1.33–8.23)           | 0.010             | 1.12 (0.68–1.84) | 0.642              |
| BMI (per 1.0 kg/m <sup>2</sup> increase) | 1.09 (0.98–1.21)           | 0.107             | 1.15 (1.07–1.24) | <0.001             |

|                                                 |                  |                   |                  |                    |
|-------------------------------------------------|------------------|-------------------|------------------|--------------------|
| LVEF <50%                                       | 1.43 (0.78–2.59) | 0.238             | 1.40 (0.90–2.18) | 0.129              |
| CrCl <60 mL/min                                 | 1.85 (0.97–3.51) | 0.059             | 1.79 (1.13–2.86) | 0.013              |
| Statin prescription                             | 0.46 (0.23–0.90) | 0.024             | 0.56 (0.32–0.97) | 0.039              |
| Number of treated lesions<br>(per 1.0 increase) | 1.03 (0.20–5.16) | 0.967             | 0.74 (0.24–2.26) | 0.606              |
| <b>Model 4</b>                                  |                  |                   |                  |                    |
| L1 SMI quartiles                                |                  | 0.032 (for trend) |                  | <0.001 (for trend) |
| Quartile 4                                      | Reference        |                   | Reference        |                    |
| Quartile 3                                      | 1.83 (0.56–5.97) | 0.315             | 3.23 (1.29–8.07) | 0.012              |
| Quartile 2                                      | 2.25 (0.74–6.79) | 0.149             | 5.54 (2.31–13.2) | <0.001             |
| Quartile 1                                      | 4.90 (1.54–15.5) | 0.007             | 12.3 (4.99–30.4) | <0.001             |
| Age >65 years                                   | 1.06 (0.57–1.97) | 0.834             | 1.00 (0.63–1.59) | 0.986              |
| Gender (male)                                   | 3.25 (1.29–8.19) | 0.012             | 1.07 (0.64–1.78) | 0.785              |
| BMI (per 1.0 kg/m <sup>2</sup> increase)        | 1.07 (0.96–1.20) | 0.182             | 1.14 (1.06–1.23) | <0.001             |
| LVEF <50%                                       | 1.29 (0.68–2.45) | 0.431             | 1.31 (0.81–2.11) | 0.264              |
| CrCl <60 mL/min                                 | 1.67 (0.87–3.23) | 0.121             | 1.70 (1.04–2.75) | 0.031              |
| Statin prescription                             | 0.45 (0.22–0.92) | 0.031             | 0.58 (0.33–1.02) | 0.060              |
| Number of treated lesions<br>(per 1.0 increase) | 0.91 (0.18–4.64) | 0.915             | 0.59 (0.18–1.88) | 0.379              |
| Number of inserted stents<br>(per 1.0 increase) | 1.58 (0.25–9.74) | 0.620             | 2.32 (0.63–8.49) | 0.200              |

|                               |                  |       |                  |       |
|-------------------------------|------------------|-------|------------------|-------|
| PCI for myocardial infarction | 0.65 (0.34–1.24) | 0.197 | 0.78 (0.48–1.27) | 0.327 |
| Hypertension                  | 0.91 (0.47–1.76) | 0.799 | 0.88 (0.55–1.41) | 0.612 |
| Diabetes                      | 2.00 (1.07–3.74) | 0.029 | 1.76 (1.13–2.74) | 0.012 |
| Previous malignancy           | 1.73 (0.70–4.25) | 0.232 | 1.15 (0.53–2.49) | 0.719 |
| Multivessel disease           | 0.55 (0.23–1.32) | 0.187 | 0.86 (0.47–1.57) | 0.631 |
| Second generation DES         | 0.90 (0.46–1.73) | 0.754 | 0.75 (0.47–1.19) | 0.227 |

---

BMI, body mass index; CI, confidence interval; CrCl, creatinine clearance; DES, drug eluting stents; L1, first lumbar vertebra; LVEF, left ventricular ejection fraction; MACE, major adverse cardiovascular event; OR, odds ratio; PCI, percutaneous coronary intervention; SMI, skeletal muscle index

## Supplementary Figures

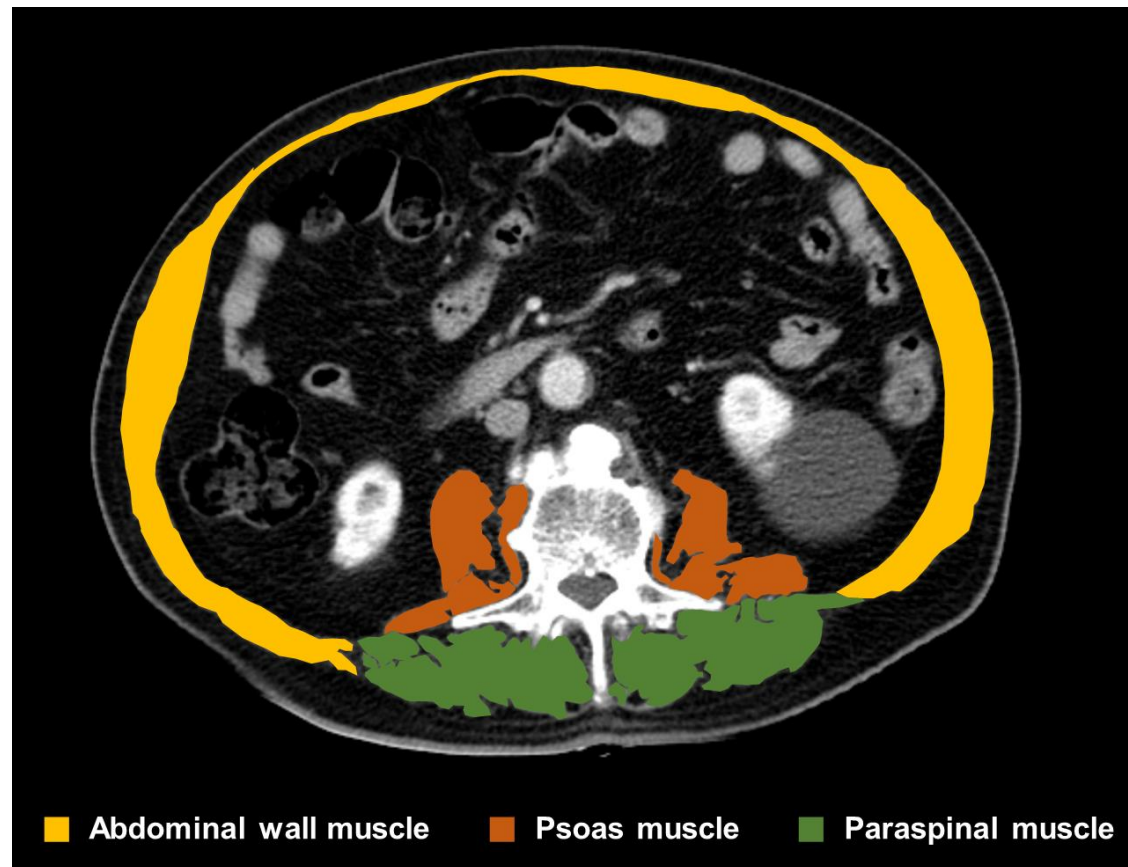

**Figure S1. Representative CT-based L3 skeletal muscle measurement**

Measurement of skeletal muscles at the L3 level consisted of the abdominal wall, psoas, and paraspinal muscles. CT, computed tomography; L3, third lumbar vertebra

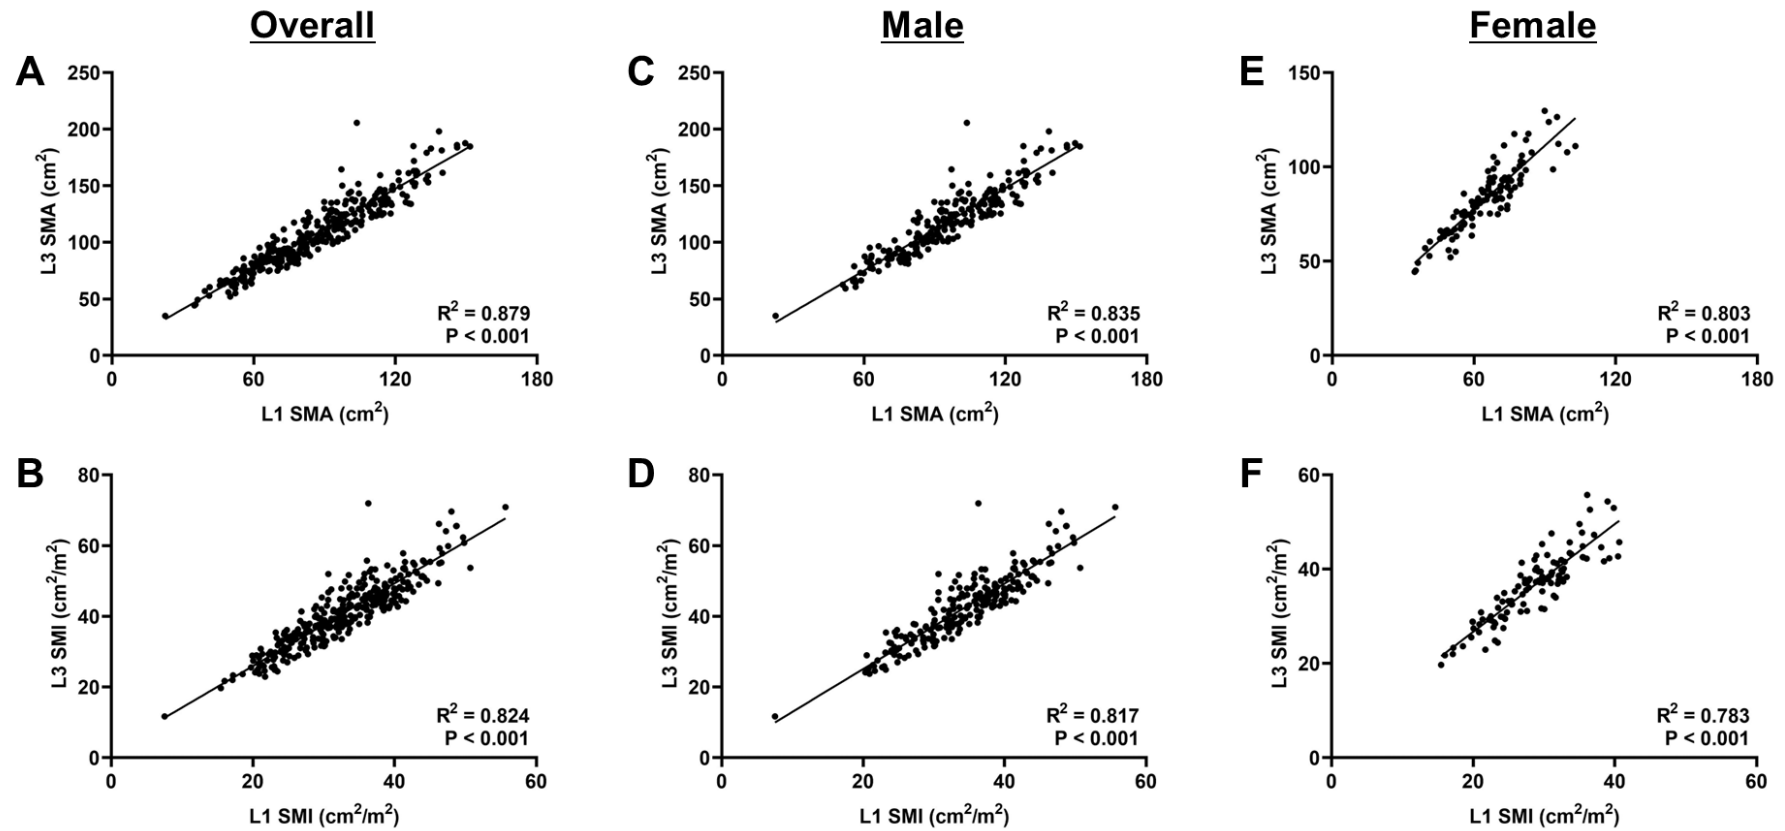

**Figure S2. Correlation between L1 and L3 skeletal muscle measurements**

Correlative analysis of L1 versus L3 SMA and SMI in the overall population (**A, B**), male patients (**C, D**), and female patients (**E, F**). L1, first lumbar vertebra; L3, third lumbar vertebra; SMA, skeletal muscle area; SMI, skeletal muscle index.
